# Supplementary material
Source: PubMed Central journal article supplement (PMC7319877)
Supplement: NIHMS1548886-supplement-Supplemental_Digital_Content_-_Tables.pdf [file NIHMS1548886-supplement-Supplemental_Digital_Content_-_Tables.pdf]

Table S1: Number of liver transplants by age using acuity circles (AC) and DSA/Region-based (DSA) allocation schemes. Data represent mean (minimum, maximum).

| Age group | Number of transplants   |                         |          |
|-----------|-------------------------|-------------------------|----------|
|           | AC*                     | DSA**                   | <i>P</i> |
| Infant    | 707 (667, 753)          | 560 (524, 582)          | <0.001   |
| Child     | 677 (651, 703)          | 547 (519, 589)          | <0.001   |
| Teenager  | 404 (384, 428)          | 248 (219, 263)          | <0.001   |
| Adult     | 16 508 (16 316, 16 634) | 16 963 (16 884, 17 151) | <0.001   |

Table S2: Median number of days on the liver transplant waitlist by age using acuity circles (AC) and DSA/Region-based (DSA) allocation schemes. Data represent mean (minimum, maximum).

|           | Days on the liver transplant waitlist |             |          |
|-----------|---------------------------------------|-------------|----------|
| Age group | AC*                                   | DSA**       | <i>P</i> |
| Infant    | 29 (26, 33)                           | 42 (40, 45) | <0.001   |
| Child     | 45 (39, 50)                           | 70 (61, 79) | <0.001   |
| Teenager  | 45 (41, 51)                           | 57 (44, 75) | 0.004    |
| Adult     | 84 (81, 89)                           | 89 (83, 92) | <0.001   |

Table S3: Median travel distance (nautical miles) for deceased-donor livers by age using acuity circles (AC) and DSA/Region-based (DSA) allocation schemes. Data represent mean (minimum, maximum).

|           | Travel distance for deceased-donor livers |                |          |
|-----------|-------------------------------------------|----------------|----------|
| Age group | AC*                                       | DSA**          | <i>P</i> |
| Infant    | 403 (390, 422)                            | 236 (230, 250) | <0.001   |
| Child     | 395 (383, 411)                            | 231 (196, 247) | <0.001   |
| Teenager  | 359 (326, 374)                            | 125 (92, 156)  | <0.001   |
| Adult     | 215 (208, 220)                            | 92 (87, 94)    | <0.001   |
